1 **TITLE:** Longitudinal glioma monitoring via cerebrospinal fluid cell-free DNA: one patient  
2 at a time.

3 **AUTHORS:** Cecile Riviere-Cazaux BS<sup>1</sup>, Xiaoxi Dong PhD<sup>2</sup>, Wei Mo MD PhD<sup>2</sup>, Chao  
4 Dai PhD<sup>2</sup>, Lucas P. Carlstrom MD PhD<sup>1,3</sup>, Amanda Munoz-Casabella MD<sup>1</sup>, Rahul  
5 Kumar MD PhD<sup>1</sup>, Keyvan Ghadimi MD<sup>1,4</sup>, Cody L. Nesvick MD<sup>1</sup>, Katherine M. Andersen  
6 PA-C<sup>1</sup>, Matthew D. Hoplin MS<sup>1</sup>, Nicholas Canaday<sup>1</sup>, Ignacio Jusue-Torres MD<sup>1</sup>, Noor  
7 Malik MBBS<sup>1</sup>, Jian L. Campian MD PhD<sup>5</sup>, Michael W. Ruff MD<sup>6</sup>, Joon H. Uhm MD<sup>6</sup>,  
8 Jeanette E. Eckel Passow PhD<sup>7</sup>, Timothy J. Kaufmann MD MS<sup>8</sup>, David M. Routman  
9 MD<sup>9</sup>, Sani H. Kizilbash MD MPH<sup>5</sup>, Arthur E. Warrington PhD<sup>1,6</sup>, Robert B. Jenkins MD  
10 PhD<sup>10</sup>, Pan Du PhD<sup>2</sup>, Shidong Jia MD PhD<sup>2</sup>, Terry C. Burns MD PhD<sup>1</sup>

11 **AFFILIATIONS:**

12 Departments of <sup>1</sup>Neurological Surgery, <sup>5</sup>Medical Oncology, <sup>6</sup>Neurology, <sup>7</sup>Quantitative  
13 Health Sciences, <sup>8</sup>Radiology, <sup>9</sup>Radiation Oncology, and <sup>10</sup>Laboratory Medicine and  
14 Pathology, Mayo Clinic, Rochester, MN, USA

15 <sup>2</sup>Predicine, Inc., Hayward, CA, USA

16 <sup>3</sup>Department of Neurological Surgery, The Ohio State University, Columbus, OH, USA

17 <sup>4</sup>Leo M. Davidoff Department of Neurological Surgery, Albert Einstein College of  
18 Medicine, Bronx, NY, USA

19 **RUNNING TITLE:** Longitudinal glioma CSF cell-free DNA

20 **CORRESPONDENCE:** Terry C. Burns, MD, PhD

21 Department of Neurosurgery – Mayo Clinic

22 200 First St. SW

23 Mayo Clinic

1 Rochester, MN, 55905

2 burns.terry@mayo.edu

3 Fax: 507-284-5206

4 Phone: 507-284-4871

5 **KEYWORDS:** glioma; biomarker; cerebrospinal fluid; monitoring; cell-free DNA

6 **WORD COUNT:** 2,998

7 **# FIGURES:** 5

8 **# TABLES:** 0

9

1 **QUESTION:** What is the feasibility of obtaining longitudinal intracranial cerebrospinal  
2 fluid cell-free DNA from patients with high-grade gliomas to evaluate changes during  
3 treatment?

4 **FINDING:** In this case series, we find that CSF cfDNA can feasibly be obtained  
5 throughout treatment via CSF access devices. We find that changes in tumor fraction or  
6 tumor-associated variant allele frequencies (VAFs) may correlate with disease  
7 trajectory, with VAFs positively correlating to other tumor-associated candidate  
8 biomarkers.

9 **MEANING:** Longitudinal cerebrospinal cell-free DNA may inform the impact of treatment  
10 throughout a specific patient's disease course, from the time of resection through  
11 radiographic progression.

1 **ABSTRACT:**

2 **IMPORTANCE:** Current methods for glioma treatment response assessment are  
3 limited. Intracranial cerebrospinal fluid (CSF) may provide a previously untapped source  
4 of longitudinal biomarkers, such as cell-free DNA (cfDNA), for disease monitoring.

5 **OBJECTIVE:** To assess the feasibility of obtaining longitudinal intracranial CSF cfDNA  
6 from patients with gliomas during their disease course.

7 **DESIGN:** This case series was initiated in 2021, with patients followed until last clinical  
8 follow-up (death or present time).

9 **SETTING:** This single-center study was conducted at a large academic medical center.

10 **PARTICIPANTS:** Adults with gliomas were recruited for longitudinal intracranial CSF  
11 collection using 1) Ommaya reservoirs, from which CSF would be sampled on at least  
12 two separate occasions, or 2) CSF collection from other clinically indicated CSF access  
13 devices, such as ventriculoperitoneal (VP) shunts.

14 **INTERVENTIONS:** CSF was collected from Ommaya reservoirs in four patients and  
15 from an existing VP shunt in one patient.

16 **MAIN OUTCOMES AND MEASURES:** The study aimed to collect CSF for biobanking  
17 and biomarker discovery, with the hypothesis that CSF could serve as a source of  
18 longitudinally acquirable biomarkers.

19 **RESULTS:** Five patients (2 females, 3 males; median: 40 years, range 32-64 years)  
20 underwent longitudinal intracranial CSF collection via Ommaya reservoirs (n=4/5  
21 patients) or VP shunt (n=1/5). Three patients had glioblastoma and two had  
22 astrocytoma, IDH-mutant, grade 4. In total, thirty-five CSF samples were obtained  
23 (median: 3.80 mL; 0.5-5 mL), with 30 (85.7%) yielding sufficient cfDNA for Next-  
24 Generation Sequencing (n=28) or Low-Pass Whole Genome sequencing (all samples).  
25 Tumor fraction was found to increase with radiographic progression. Changes in variant  
26 allelic frequencies (VAFs) may be seen within individual patients after resection and  
27 chemoradiation. In two patients, changes in tumor-specific IDH1 VAF correlated with  
28 CSF D-2-hydroxyglutarate levels, the oncometabolite of IDH mutant tumors. Copy  
29 number burden (CNB) decreased below the limit of quantification during treatment.

30 **CONCLUSIONS AND RELEVANCE:** Longitudinal CSF cfDNA can feasibly be obtained  
31 via CSF access devices in patients with gliomas during their disease course. Ongoing

- 1 studies will evaluate hypotheses generated in this case series regarding how
- 2 longitudinal CSF cfDNA could be utilized to sensitively detect changes in disease
- 3 burden.
- 4 **Trial Registration:** NCT04692324 <https://clinicaltrials.gov/study/NCT04692324>;
- 5 NCT04692337 <https://clinicaltrials.gov/study/NCT04692337>

## 1 INTRODUCTION

2 Few tools exist to monitor glioma burden and biological response to standard-of-  
3 care chemoradiation or experimental therapies. The availability of serial biopsy samples  
4 has enabled rapid progress in monitoring for some cancers, including breast cancer,  
5 melanoma, and blood-based cancers<sup>1-5</sup>. However, the requirement for brain biopsy to  
6 obtain glioma tissue during treatment has hindered monitoring<sup>6,7</sup>. MRI is standard-of-  
7 care for treatment response assessment, but its sensitivity and specificity remain a  
8 limitation<sup>8,9</sup>. Based on well-established cancer genomic markers, cell-free DNA (cfDNA)  
9 in liquid biopsies has become of growing interest for cancer detection and monitoring,  
10 particularly in plasma<sup>10-13</sup>. Numerous trials are now leveraging cfDNA to guide  
11 therapeutic decision making<sup>14-19</sup>. However, the blood-brain barrier has hampered  
12 detection of tumor-associated cfDNA in plasma, also known as cell-tumor DNA (ctDNA),  
13 with studies reporting a low detection rate, often between 10-50%<sup>20-22</sup>.

14 Studies in other cancers, such as prostate cancer<sup>23,24</sup>, demonstrate that proximal  
15 fluids improve detection of tumor-derived biomarkers<sup>25</sup>. Similarly, as the liquid source  
16 closest to the tumor, cfDNA detection rates in cerebrospinal fluid (CSF) from patients  
17 with brain tumors, including gliomas and brain metastases, increase to an average of  
18 approximately 85% in more recent studies<sup>26-30</sup>. CSF cfDNA studies in glioma have  
19 repeatedly demonstrated the superiority of CSF to plasma for cfDNA detection<sup>27,29</sup>, as  
20 well as the fidelity of cfDNA for reporting mutations detected in tissue<sup>31</sup>. Instead of  
21 targeted sequencing for mutations, recent studies have increasingly utilized Next-  
22 Generation Sequencing (NGS) or low-pass whole genome sequencing (LP-WGS) to

1 characterize the global genomic landscape of glioma CSF cfDNA for tumor diagnosis  
2 and identification of treatment-resistant mutations<sup>32, 33</sup>.

3         Longitudinal CSF cfDNA may be useful for disease monitoring. A previous study  
4 reported on changes in tumor-associated mean allele frequencies between two CSF  
5 timepoints<sup>27</sup>. However, to our knowledge, no study has obtained longitudinal intracranial  
6 CSF samples for cfDNA analysis during a patient's disease course. We hypothesized  
7 that intracranial CSF could be an abundant source of longitudinally acquirable cfDNA.  
8 Herein, we report our initial experience utilizing CSF access devices to determine how  
9 CSF cfDNA changes during treatment in patients with glioblastoma (GBM) or  
10 astrocytoma, IDH mutant (CNS WHO grade 4). Moreover, we identify remaining  
11 questions to guide ongoing and future studies aiming to utilize CSF cfDNA for disease  
12 burden monitoring during standard-of-care or clinical trials for patients with gliomas.

## 13 **MATERIALS AND METHODS**

### 14 *Patient cohort*

15         Informed consent was provided by each patient for collection of CSF in the  
16 operating room or clinic under biobanking, CSF biomarkers (NCT04692324, to obtain  
17 CSF from clinically indicated CSF devices), or Ommaya reservoir (NCT04692337, for  
18 research) protocols, each of which were approved via the Mayo Clinic Institutional  
19 Review Board. For all studies, inclusion criteria included adult patients with known or  
20 suspected brain neoplasms. For NCT04692337, inclusion criteria also included planned  
21 resection of the neoplasm and willingness to have the Ommaya sampled on 2 future  
22 occasions. Exclusion criteria for NCT04692324 included a clinical contraindication to the

1 intended route of CSF access, and for NCT04692337, any prior wound infection or  
2 contraindication to the Ommaya.

### 3 *CSF collection*

4 Patients had CSF access devices for longitudinal CSF access (4 research  
5 Ommaya reservoirs, 1 clinical ventriculoperitoneal shunt). The ventricular catheters  
6 were placed into the resection cavity, which contacted the ventricular system in each  
7 patient. CSF was sampled intra-operatively from the surgical field. In follow-up cases,  
8 20 mL of CSF was slowly withdrawn from the Ommaya reservoir or shunt. CSF was  
9 maintained on ice or at 4°C (typically <1 hour), then centrifuged at 400G for 10 minutes  
10 at 4°C. De-identified aliquots were stored at -80°C in cryovials. Samples were annotated  
11 to include the known pathology, date of collection, and ongoing treatment, as well as  
12 technical variables including sample color, collection, and processing times.

### 13 *Cell-free DNA extraction and sequencing*

14 Thirty-five CSF samples were analyzed across the 5 patients (median number of  
15 samples per patient: 7 (range: 3-12); median volume per sample: 3.80 mL (range: 0.5-5  
16 mL)), of which 30 (85.7%) yielded sufficient cfDNA for testing. Patient samples were  
17 analyzed using two comprehensive NGS platforms, PredicineCARE and  
18 PredicineSCORE (Predicine, Inc.), to generate genomic aberration profiles and derive  
19 genome-wide copy number burden (CNB) score. Briefly, cell-free DNA (cfDNA) were  
20 subjected to library construction. PredicineCARE targeted hybridization enrichment  
21 assay was used to generate the landscape of genomic alterations including single-  
22 nucleotide variants (SNV), insertions and deletions (indels), CNVs, and gene fusions<sup>34-</sup>  
23 <sup>37</sup>. PredicineSCORE low pass whole genome sequencing assay was used to generate



1 copy number profiles and genome-wide copy number burden (CNB) score, which  
2 represents a comprehensive genome-wide measure of copy number status, including  
3 amplifications and deletions if any, across the entire chromosome arms. See  
4 Supplemental methods for further details.

## 5 RESULTS

### 6 *Patient 24 – Recurrent glioblastoma*

7 The first patient to enroll on our Ommaya reservoir trial (Patient 24 in our CSF  
8 biobank) was a female in her late 50s with suspected recurrence of her GBM after  
9 standard chemoradiation (**Fig. 1A**). At her first post-operative CSF sample on post-  
10 operative day (POD) 26 after re-resection, a new region of substantial periventricular  
11 progression was observed on MRI, prompting initiation of lomustine (CCNU). At her  
12 next sample on POD75, further progression was noted, prompting transition to  
13 bevacizumab. The final CSF sample was obtained on POD118, at which time MRI  
14 showed ongoing progression on bevacizumab. She transitioned to hospice and passed  
15 away on POD152.

16 Ventricular CSF was sent from the surgical field and was found to contain  
17 insufficient cfDNA (0.00 ng/mL) for baseline testing (**Fig. 1Bi**). By contrast, the POD26  
18 sample contained 9.95 ng/mL that decreased to 1.77 ng/mL after lomustine (POD75),  
19 despite radiographic disease progression after lomustine. This sample was insufficient  
20 for NGS, hampering evaluation of tumor fraction that otherwise increased 6.28x  
21 between POD26 and POD118 (**Fig. 1Bii**). LP-WGS was also performed and revealed  
22 that copy number burden (CNB) increased above the limit of quantification by POD118  
23 (**Fig. 1Biii**). Trisomy 7, loss of 9p (including CDKN2A/B), and gains on chromosomes  
24 19 and 20 were detectable on the copy number plot by POD118 (**Fig. 1Ci**).

1 Consistent with the patient's known EGFR-amplified tumor, the variant allele  
2 frequency (VAF) for mutant EGFR increased from 3.21% to 44.84% between her pre-  
3 lomustine and post-bevacizumab samples (**Fig. 1cii**). The patient's glioma harbored a  
4 TERT C228T mutation that was detectable at a VAF of 10.66% by the post-  
5 bevacizumab sample (POD118).

6 Initial observations generated by patient 24 (**Fig. 1D**) included that tumor fraction  
7 and VAFs may increase with progression (**Fig. 1Bii, 1Cii**). CNB may also increase  
8 above the estimated limit of quantification (CNB>7.5) (**Fig. 1Biii**). However, despite  
9 radiographic progression at POD75, few data points were available due to limited  
10 cfDNA abundance after lomustine. This raised the question of whether alkylating  
11 therapy may decrease CSF cfDNA, even if ineffective. With these initial observations,  
12 we sought to evaluate patients during therapy from the time of original diagnosis.

### 13 *Patient 78 – Glioblastoma*

14 Patient 78 (male in early 60s) underwent Ommaya placement during resection  
15 of a cystic lesion that proved to be GBM (**Fig. 2A**). The patient enrolled in a trial of  
16 pembrolizumab with standard chemoradiation. Imaging raised concern for progression  
17 around POD270, prompting initiation of regorafenib, a tyrosine kinase inhibitor. Further  
18 radiographic progression prompted transition to bevacizumab, with radiographic  
19 response. The patient transitioned to hospice and passed away on POD729.

20 CSF from a cortical sulcus and cyst fluid were both obtained during surgery, the  
21 latter of which yielded 104.2x more cfDNA (**Fig. 2Bi**). Total cfDNA abundance, tumor  
22 fraction, and CNB increased in post-resection CSF relative to the sulcal CSF sample  
23 (**Fig. 2Bi-iii**), likely reflecting the combined effect of recent tissue disruption and

1 increased tumor contact with post-operatively sampled ventricular CSF. These  
2 measures then decreased with chemoradiation and pembrolizumab (POD202 versus  
3 21; **Fig. 2Bi-iii**). No CSF cfDNA was extractable at POD107 immediately after  
4 chemoradiation. Despite suspected radiographic progression around POD270 which  
5 prompted initiation of regorafenib, no cfDNA could be extracted from CSF obtained at  
6 POD245. CSF obtained during regorafenib treatment demonstrated increased total  
7 cfDNA abundance, with CNB decreasing below the limit of quantification (POD 296; **Fig.**  
8 **2Bi; ii**). cfDNA abundance declined with initiation of bevacizumab prior to increasing  
9 again by POD471, suggesting relative variability in cfDNA abundance despite minimal  
10 radiographic changes (**Fig 2Bii**). In contrast, CNB remained below the limit of  
11 quantification (**Fig. 2Biii**). +7, -10, +19 and +20 and other alterations were observed on  
12 the copy number plots on POD0 and could not be detected after chemoradiation and  
13 pembrolizumab (**Fig. 2Ci-ii**). TP53 and TERT VAFs initially increased after  
14 bevacizumab prior to decreasing by POD471 (**Fig. 2Ciii; Supplemental Fig. 1A**). In  
15 sum, initial observations for patient 78 (**Fig. 2D**) included that resection may not  
16 decrease CSF cfDNA even by POD21 (**Fig. 2Bi**). CNB and tumor-associated VAFs may  
17 decrease during chemoradiation (**Fig. 2Biii; Ciii**). Increased radiographic enhancement,  
18 but decreased CNB and VAFs, at POD296 prompted the question of whether  
19 pseudoprogression could increase total CSF cfDNA.

#### 20 *Patient 79 – Glioblastoma*

21 Patient 79 is a female in her early 30s who underwent resection for a GBM (**Fig.**  
22 **3A**). Given an expected subtotal resection and the highly vascular nature of her tumor,  
23 an EVD was also placed at the time of surgery in addition to her Ommaya reservoir.

1 MSH2 and MSH6 staining revealed loss of expression, diagnostic of defective DNA  
2 mismatch repair. Next Generation Sequencing revealed over 200 mutations supportive  
3 of a hypermutant phenotype. Considering literature support for immunotherapy in  
4 hypermutation phenotypes<sup>38</sup>, she was treated with pembrolizumab, which began prior to  
5 chemoradiation. Radiographic progression near POD300 resulted in discontinuation of  
6 pembrolizumab and initiation of bevacizumab to which there was radiographic  
7 response.

8 Intra-operatively obtained CSF yielded 15.60 ng/mL of cfDNA that transiently  
9 increased to 82.00 ng/mL when CSF was obtained from the EVD on POD2 (**Fig. 3Bi**).  
10 In contrast, tumor fraction decreased from 0.597 to 0.368 (**Fig. 3Bii**), potentially  
11 suggesting that much of the cfDNA on POD2 was from post-operative tissue disruption.  
12 Interestingly, despite the hypermutated phenotype, this tumor lacked evidence of  
13 chromosomal complexity, with a stably low CNB below the limit of quantification and no  
14 obvious chromosomal alterations on the whole genome plots (**Fig. 3Biii; 4Ci-iii**), unlike  
15 most GBMs that harbor +7/-10q alterations. In stark contrast, the longitudinal variant  
16 allele frequency plot demonstrated marked evolution of mutations over time (**Fig. 3Civ**).  
17 POD2 revealed variants not seen on POD0, likely reflecting incomplete sampling of a  
18 heterogeneous lesion in the initial CSF. New variants seen on POD36 likely represent  
19 ongoing disease evolution prior to chemotherapy.

20 In summary (**Fig. 3D**), samples from patient 79 suggested that early post-  
21 operative samples may have transiently increased cfDNA (**Fig. 3Bi**). Resection may  
22 expose more variants in a heterogeneous tumor, that may then evolve further prior to  
23 treatment (**Fig. 3Civ**). Given these findings, this patient's data raised the question of

1 whether a post-operative CSF sample may better sample or capture tumor  
2 heterogeneity (**Fig. 3D**).

3 *Patient 98 – Astrocytoma, IDH mutant (CNS WHO grade 4)*

4 Patient 98 is a male in his early 40s who underwent resection of an astrocytoma,  
5 IDH mutant (CNS WHO grade 4) and Ommaya placement (**Fig. 4A**). In addition to  
6 standard-of-care chemoradiation, he participated in an immunotherapy trial wherein he  
7 was randomized to either NT-17 or placebo at an outside facility. No post-operative CSF  
8 samples were obtained until POD146 after chemoradiation when MRI raised concern for  
9 progression versus pseudoprogression.

10 Despite variable changes in cfDNA abundance and increasing radiographic  
11 contrast enhancement, tumor fraction decreased and CNB fell below the limit of  
12 quantification during treatment and observation (**Fig. 4Bi-iii**). Indeed, while contrast-  
13 enhancing volume increased, decreasing IDH1 VAF also correlated with decreasing  
14 CSF D-2-hydroxyglutarate (D-2-HG) levels, an oncometabolite of IDH mutant tumors  
15 (**Fig. 4Biv**)<sup>39</sup>. Gain of 2p, gain of 7q, loss of 9p (without CDKN2A/B homozygous  
16 deletion), and loss of 10q, all common alterations in astrocytoma, IDH-mutant, were  
17 detected in the POD0 sample, but these were no longer detectable by POD305 (**Fig.**  
18 **4Ci-ii**). In addition to IDH1 (**Fig. 4Biv**), VAFs for most detected mutations decreased  
19 with treatment, with only one of the originally detected variants present by POD361  
20 when the patient was on observation (**Fig. 4Ciii; Supplemental Fig. 1B**).

21 In summary (**Fig. 4D**), observations from patient 98 suggested that CNB may  
22 decrease below the limit of quantification with treatment (**Fig. 4Biii**), as seen with  
23 patient 78 (**Fig. 2Biii**). Moreover, IDH1 VAF may correlate with changes in CSF D-2-HG

1 **(Fig 4Biv)**. As with patient 78, we again questioned whether pseudoprogression could  
2 increase CSF cfDNA yield. Agreement between tumor fraction, IDH1 VAF, 2-HG, and  
3 CNB despite increasing enhancing volume prompted the hypothesis that CSF cfDNA  
4 may be superior to MRI for treatment response monitoring.

5 *Patient 138 – Astrocytoma, IDH mutant (CNS WHO grade 4)*

6 Patient 138 is a male in his early 30s who underwent pre-operative EVD  
7 placement due to clinical decline with ventriculomegaly. His EVD was maintained after  
8 tumor resection, which revealed an astrocytoma, IDH mutant (CNS WHO grade 4). Due  
9 to difficulty weaning the EVD, a ventriculoperitoneal shunt was placed **(Fig. 5A)**. By  
10 POD214, radiographic disease progression was suspected, and the patient was initiated  
11 on lomustine.

12 CSF was obtained from the patient's EVD prior to and after resection. cfDNA  
13 abundance increased from 31.81 ng/mL to 50.22 ng/mL, while tumor fraction decreased  
14 0.198 to 0.042 **(Fig. 5Bi-ii)**. Tumor fraction then increased by 2.87x to 0.121 by  
15 suspected progression on POD214 **(Fig. 5Bii)**. CNB decreased and remained below the  
16 limit of quantification after resection through POD214 **(Fig. 5Biii)**. IDH1 VAF decreased  
17 with resection prior to increasing at the time of suspected radiographic progression  
18 (POD214), consistent with D-2-HG increasing from 0.4 to 1.02  $\mu$ M **(Fig. 5Biv)**.  
19 Chromosome 6p gain and 6q loss, 11q gain, and 13q loss, all common in astrocytoma,  
20 IDH-mutant, were identified at POD0, although almost no copy number alterations could  
21 be detected by POD214 **(Fig. 5Ci-ii)**. TP53 VAF decreased with resection and  
22 increased by POD214, along with the emergence of a GNAS mutation **(Fig. 5Ciii)**.

1 Patient 138 yielded findings reminiscent of those seen in prior patients: 1) as with  
2 patient 24, tumor fraction may increase with suspected disease progression (**Fig. 5Bii**);  
3 2) as with patient 98 (**Fig. 4Biv**), IDH VAF may correlate with changes in D-2-HG (**Fig.**  
4 **5Biv**), and 3) as with patient 79 (**Fig. 3Bi**), resection may transiently increase cfDNA  
5 abundance in early post-operative samples (**Fig. 5Bi**). A remaining question was the  
6 threshold at which to call disease progression based on cfDNA.

## 7 **DISCUSSION**

8 In this five-patient case series, we report our initial experience with longitudinal  
9 intracranial CSF for cfDNA analysis in patients undergoing treatment for glioblastoma or  
10 astrocytoma, IDH mutant, grade 4. Although preliminary, our findings provoke the  
11 following hypotheses to be further tested: (1) Tumor fraction may increase with  
12 suspected disease progression, (2) cfDNA abundance is variable across samples, but  
13 may transiently increase post-operatively and with pseudoprogression, (3) changes in  
14 mutational variants and their allelic frequencies may be seen within individual patients  
15 via longitudinal CSF sampling, (4) CSF D-2-HG levels may correlate with changes in  
16 IDH1 cfDNA, despite incongruent radiographic findings, and (5) CNB decreases below  
17 the limit of quantification during treatment with current techniques. Key questions  
18 included whether pseudoprogression could increase cfDNA abundance and importantly,  
19 what is the required threshold of change in each cfDNA measure to call disease  
20 progression.

21 CfDNA burden in other cancer types has been shown to increase with recent  
22 resection or treatment, likely due to disruption of the tissue resulting in release of  
23 cfDNA<sup>40-42</sup>. Indeed, after resection, CSF cfDNA burden transiently increased for each

1 patient where CSF was obtained prior to and after resection, and remained elevated  
2 even by POD21 in patient 78. As resection increases surgical debris that also has its  
3 own cell-free DNA, it is possible that ongoing surgical debris may overestimate the  
4 relative decrease in tumor fraction based on the ratio of tumor-versus-non-tumor cfDNA.  
5 This points to the importance of obtaining a sample immediately prior to  
6 chemoradiation, when surgical debris has decreased. Moreover, while some post-  
7 resection cfDNA may be attributable to debris, it remains to be established in gliomas  
8 whether post-resection cfDNA levels correlate with patient prognosis, as has been  
9 identified in other cancer types<sup>43, 44</sup>.

10 In patient 79, new variants were detected on POD2 after resection. Prior studies,  
11 including in glioma, reported that numerous mutations were detected in CSF or plasma,  
12 but not in the original tumor tissue<sup>27, 45</sup>. When CSF is obtained prior to surgical  
13 resection, it may only contact one portion of the tumor, if at all, depending on the  
14 anatomical location. However, resection can then increase CSF contact with new areas  
15 of the infiltrative tumor margin as compared to CSF obtained prior to resection<sup>28, 46</sup>. As  
16 such, it may be helpful to obtain both a pre-resection and post-resection/pre-  
17 chemoradiation sample to determine the full spectrum of detectable tumor mutations for  
18 longitudinal monitoring. The latter post-resection sample may then serve as the baseline  
19 sample for monitoring disease burden and treatment response.

20 Prior studies have demonstrated that tumor contact with CSF, as well as tumor  
21 size and grade, are key factors for detection of tumor cfDNA in CSF<sup>28, 31, 32, 46</sup>. One  
22 study in 21 medulloblastomas, ependymomas, and high-grade gliomas demonstrated  
23 that CSF cfDNA could be detected in tumors with CSF contact, whereas no cfDNA was



1 found in tumors that were distant from CSF<sup>28</sup>. Multiple prior studies in other cancer  
2 types have noted the superiority of proximal fluids for cfDNA detection<sup>23, 25</sup>. As such,  
3 use of CSF access devices in a resection cavity, as performed in our study, is a  
4 particularly attractive option for longitudinal CSF acquisition, allowing for close access to  
5 the source of the cfDNA. As most gliomas recur around the previous resection cavity<sup>47,</sup>  
6 <sup>48</sup>, disease progression should be detectable. However, this needs to be demonstrated  
7 in a larger cohort of patients.

8 Our observational case series is intended for hypothesis generation and has  
9 numerous limitations. Pre-chemoradiation CSF was not always obtained. CSF cfDNA  
10 was also not analyzable in 5/35 samples and CSF cfDNA was not always abundant  
11 enough to allow for NGS at each timepoint, hence only LP-WGS could be performed,  
12 resulting in missing VAF data. To minimize false positives in CNB calls, intracranial non-  
13 tumor control CSF samples will need to be evaluated. Identification of thresholds of  
14 change indicative of changes in disease burden will be needed to determine whether  
15 changes in cfDNA-associated measures could adjudicate radiographic progression  
16 versus treatment effect or predict disease recurrence<sup>49-52</sup>. When available, multiple  
17 independent -omics in the same CSF sample, (e.g., D-2-HG) may increase confidence  
18 in interpreting cfDNA changes.

## 19 **CONCLUSION**

20 Longitudinal acquisition of intracranial CSF cfDNA is feasible and can generate  
21 hypotheses regarding the impact of treatment and progression on cfDNA throughout a  
22 patient's disease course. Further studies are needed to determine the thresholds of  
23 change in cfDNA metrics that may correlate with changes in disease burden.

1 **FUNDING:** CRC was supported by the National Institute of Health T32GM145408. AMC  
2 was supported by NIH T32GM00868. TCB, TJK, SHK, and JEP were supported by  
3 NINDS R61 NS122096. TCB was supported by the Mayo Clinic Center for  
4 Individualized Medicine and CCaTS award UL1TR002377, the American Brain Tumor  
5 Association, Brains Together for the Cure, Humor to fight the Tumor, and Lucius &  
6 Terrie McKelvey.

7 **AUTHORSHIP:**

- 8 - Study design and conception: TCB, CRC, LPC, AMC, SJ, PD
- 9 - Sample acquisition: CLN, KMA, NC, IJT, NM, TCB
- 10 - Sample processing and extraction: CRC, WM, SI, KG, ABZ, MDH, AEW
- 11 - Analyzed data: CRC, TCB, XD, CD, TJK, RBJ, PD, SJ
- 12 - Critically reviewed manuscript: all authors

13 **DATA AVAILABILITY:** All data are available as supplementary files.

14 **ETHICS:** This study was approved by the Mayo Clinic Institutional Review Board and all  
15 participants provided their consent to participate in this study. This study was performed  
16 in accordance with the Declaration of Helsinki.

17 **CONSENT:** All participants have provided consent for publication.

18 **ACKNOWLEDGMENTS:** We thank our patients and their families for their participation  
19 in this study. We thank the Mayo Clinic Neurosurgery Clinical Research, neurosurgery  
20 residents, and surgical team for their technical and research support.

21 **CONFLICT OF INTEREST:** Xiaoxi Dong, Chao Dai, Wei Mo, Pan Du, and Shidong Jia  
22 report employment at Predicine, Inc. Wei Mo, Pan Du, and Shidong Jia also report stock  
23 and other ownership interests in Predicine, Inc.

1 **FIGURE LEGENDS:**

2 **Figure 1. Longitudinal cerebrospinal fluid cell-free DNA from patient 24 (recurrent**

3 **glioblastoma). (A)** The timeline of the clinical course of patient 24 is depicted starting

4 from post-operative (POD) 0, the day of resection for her recurrent GBM. Black X

5 indicates when CSF samples were obtained and sequenced; red X indicates when CSF

6 was sampled but had insufficient cfDNA for analysis. Correlative MRIs are shown for

7 each timepoint. **(B) (i)** Total cell-free (cfDNA) abundance, **(ii)** tumor fraction, and **(iii)**

8 copy number burden (CNB) were calculated from each CSF sample. CNB<7.5 (grey

9 box) is below the limit of quantification. **(C)(i)** Copy number plots were generated for

10 each CSF sample; POD118 is shown, and **(ii)** The variant allele frequencies (VAFs)

11 were calculated for the two samples where sufficient cfDNA was obtained for next-

12 generation sequencing (NGS), at POD26 and 118. **(D)** Observations and questions

13 were raised by patient 24's data. Red X = CSF obtained, insufficient cfDNA for testing.

14 **Figure 2. Longitudinal cerebrospinal fluid cell-free DNA from patient 78**

15 **(glioblastoma). (A)** The timeline of the clinical course of patient 78 is depicted starting

16 from post-operative (POD) 0, the day of resection for his primary GBM. On POD0, both

17 CSF (solid circle) and cyst fluid (hollow circle) were analyzed. The patient underwent

18 treatment with pembrolizumab in addition to standard chemoradiation. Black X indicates

19 when CSF samples were obtained and sequenced; red X indicates when CSF was

20 sampled but had insufficient cfDNA for analysis. Correlative MRIs are shown for each

21 timepoint. **(B)(i)** Total cell-free DNA (cfDNA) abundance, **(ii)** tumor fraction, and **(iii)**

22 copy number burden (CNB) were calculated from each CSF sample. **(C)(i-ii)** Copy

23 number plots were generated for each sample; POD0 from the cyst fluid and POD202

1 are shown. **(iii)** Fishplot depicting the variant allele frequency of five detected mutations  
2 from POD0 to 471. **(D)** Observations and questions were raised by patient 78's data.  
3 Red X = CSF obtained, insufficient cfDNA for testing.

### 4 **Figure 3. Longitudinal cerebrospinal fluid cell-free DNA from patient 79**

5 **(glioblastoma, mismatch repair deficient).** **(A)** The timeline of the clinical course of  
6 patient 79 is depicted starting from post-operative (POD) 0, the day of resection for her  
7 glioblastoma that was mismatch repair deficient. She also underwent treatment with  
8 pembrolizumab in addition to standard chemoradiation. Black X indicates when CSF  
9 samples were obtained and sequenced; red X indicates when CSF was sampled but  
10 had insufficient cfDNA for analysis. Correlative MRIs are shown for each timepoint.  
11 Dashed lines = missing data between two points. **(B)(i)** Total cell-free DNA (cfDNA)  
12 abundance, **(ii)** tumor fraction, and **(iii)** copy number burden (CNB) were calculated  
13 from each CSF sample. **(C)(i-iii)** Copy number plots were generated for each CSF  
14 sample; POD0, 36, and 310 are shown, and **(iv)** fishplot depicting the variant allele  
15 frequency of numerous detected mutations from POD0 to 493. **(D)** Observations and  
16 questions were raised by patient 79's data. Red X = CSF obtained, insufficient cfDNA  
17 for testing.

### 18 **Figure 4. Longitudinal cerebrospinal fluid cell-free DNA from patient 98**

19 **(astrocytoma, IDH mutant, CNS WHO grade 4).** **(A)** The timeline of the clinical course  
20 of patient 98 is depicted starting from post-operative (POD) 0, the day of resection for  
21 his astrocytoma, IDH mutant, CNS WHO grade 4. Black X indicates when CSF samples  
22 were obtained and sequenced; red X indicates when CSF was sampled but had  
23 insufficient cfDNA for analysis. **(B) (i)** Total cell-free DNA (cfDNA) abundance, **(ii)** tumor

1 fraction, and **(iii)** copy number burden (CNB) were calculated from each CSF sample.  
2 Additionally, **(iv)** volumetrics was performed to calculate the enhancing tumor volume  
3 ( $\text{cm}^3$ ) from each timepoint. The variant allele frequency (VAF) for the IDH1 mutation and  
4 the levels of D-2-hydroxyglutarate (D-2-HG, in  $\mu\text{M}$ ) were also quantified at each  
5 timepoint. Hollow triangle: no IDH1 VAF detected. **(C)(i-ii)** Copy number plots were  
6 generated for each CSF sample; POD0 and 305 are shown. **(iii)** Fishplot depicting the  
7 VAFs of six detected mutations from POD0 to 361. **(D)** Observations and questions  
8 were raised by patient 98's data.

9 **Figure 5. Longitudinal cerebrospinal fluid cell-free DNA from patient 138**

10 **(astrocytoma, IDH mutant, grade 4).** **(A)** The timeline of the clinical course of patient  
11 138 is depicted starting from post-operative (POD) 0, the day of resection for his  
12 astrocytoma, IDH mutant, grade 4. Black X indicates when CSF samples were obtained  
13 and sequenced; red X indicates when CSF was sampled but had insufficient cfDNA for  
14 analysis. **(B)(i)** Total cell-free DNA (cfDNA) abundance, **(ii)** tumor fraction, and **(iii)** copy  
15 number burden (CNB) were calculated from each CSF sample. **(iv)** The variant allele  
16 frequency (VAF) for the IDH1 mutation and the levels of D-2-hydroxyglutarate (D-2-HG,  
17 in  $\mu\text{M}$ ) were quantified at each timepoint. **(C)(i-ii)** Copy number plots were generated for  
18 each sample; POD0 and 214 shown, as well as **(iii)** a fishplot depicting the VAFs of  
19 mutations from POD0 to 214. **(D)** Observations and questions were raised by patient  
20 138's data.

21

## 1 REFERENCES

- 2 1. Johnson BE, Creason AL, Stommel JM, et al. An omic and multidimensional spatial atlas  
3 from serial biopsies of an evolving metastatic breast cancer. *Cell Rep Med*. Feb 15  
4 2022;3(2):100525. doi:10.1016/j.xcrm.2022.100525
- 5 2. Li A, Keck JM, Parmar S, et al. Characterizing advanced breast cancer heterogeneity  
6 and treatment resistance through serial biopsies and comprehensive analytics. *npj Precision*  
7 *Oncology*. 2021/03/26 2021;5(1):28. doi:10.1038/s41698-021-00165-4
- 8 3. Daud AI, Wolchok JD, Robert C, et al. Programmed Death-Ligand 1 Expression and  
9 Response to the Anti-Programmed Death 1 Antibody Pembrolizumab in Melanoma. *Journal of*  
10 *Clinical Oncology*. 2016;34(34):4102-4109. doi:10.1200/jco.2016.67.2477
- 11 4. Assouline SE, Nielsen TH, Yu S, et al. Phase 2 study of panobinostat with or without  
12 rituximab in relapsed diffuse large B-cell lymphoma. *Blood*. 2016;128(2):185-194.  
13 doi:10.1182/blood-2016-02-699520
- 14 5. Tabernero J, Rojo F, Calvo E, et al. Dose- and schedule-dependent inhibition of the  
15 mammalian target of rapamycin pathway with everolimus: a phase I tumor pharmacodynamic  
16 study in patients with advanced solid tumors. *J Clin Oncol*. Apr 1 2008;26(10):1603-10.  
17 doi:10.1200/jco.2007.14.5482
- 18 6. McFaline-Figueroa JR, Wen PY. Negative trials over and over again: How can we do  
19 better? *Neuro-Oncology*. 2022;25(1):1-3. doi:10.1093/neuonc/noac226
- 20 7. Singh K, Hotchkiss KM, Parney IF, et al. Correcting the drug development paradigm for  
21 glioblastoma requires serial tissue sampling. *Nat Med*. Oct 2023;29(10):2402-2405.  
22 doi:10.1038/s41591-023-02464-8
- 23 8. Kumar AJ, Leeds NE, Fuller GN, et al. Malignant gliomas: MR imaging spectrum of  
24 radiation therapy- and chemotherapy-induced necrosis of the brain after treatment. *Radiology*.  
25 Nov 2000;217(2):377-84. doi:10.1148/radiology.217.2.r00nv36377
- 26 9. van Dijken BRJ, van Laar PJ, Holtman GA, van der Hoorn A. Diagnostic accuracy of  
27 magnetic resonance imaging techniques for treatment response evaluation in patients with high-  
28 grade glioma, a systematic review and meta-analysis. *Eur Radiol*. Oct 2017;27(10):4129-4144.  
29 doi:10.1007/s00330-017-4789-9
- 30 10. Wadden J, Ravi K, John V, Babila CM, Koschmann C. Cell-Free Tumor DNA (cf-tDNA)  
31 Liquid Biopsy: Current Methods and Use in Brain Tumor Immunotherapy. *Front Immunol*.  
32 2022;13:882452. doi:10.3389/fimmu.2022.882452
- 33 11. Bagley SJ, Nabavizadeh SA, Mays JJ, et al. Clinical utility of plasma cell-free DNA in  
34 adult patients with newly diagnosed glioblastoma: a pilot prospective study. *Clinical Cancer*  
35 *Research*. 2020;26(2):397-407.
- 36 12. Alix-Panabières C, Pantel K. Liquid Biopsy: From Discovery to Clinical Application.  
37 *Cancer Discovery*. 2021;11(4):858-873. doi:10.1158/2159-8290.Cd-20-1311
- 38 13. Soffietti R, Bettgowda C, Mellinghoff IK, et al. Liquid biopsy in gliomas: A RANO review  
39 and proposals for clinical applications. *Neuro Oncol*. Jun 1 2022;24(6):855-871.  
40 doi:10.1093/neuonc/noac004
- 41 14. Bidard FC, Hardy-Bessard AC, Dalenc F, et al. Switch to fulvestrant and palbociclib  
42 versus no switch in advanced breast cancer with rising ESR1 mutation during aromatase  
43 inhibitor and palbociclib therapy (PADA-1): a randomised, open-label, multicentre, phase 3 trial.  
44 *Lancet Oncol*. Nov 2022;23(11):1367-1377. doi:10.1016/s1470-2045(22)00555-1
- 45 15. Tie J, Cohen JD, Lahouel K, et al. Circulating Tumor DNA Analysis Guiding Adjuvant  
46 Therapy in Stage II Colon Cancer. *New England Journal of Medicine*. 2022;386(24):2261-2272.  
47 doi:10.1056/NEJMoa2200075
- 48 16. Taïeb J, Benhaim L, Laurent Puig P, et al. "Decision for adjuvant treatment in stage II  
49 colon cancer based on circulating tumor DNA:The CIRCULATE-PRODIGE 70 trial". *Digestive*  
50 *and Liver Disease*. 2020/07/01/ 2020;52(7):730-733. doi:10.1016/j.dld.2020.04.010

- 1 17. Nakamura Y, Okamoto W, Kato T, et al. Circulating tumor DNA-guided treatment with  
2 pertuzumab plus trastuzumab for HER2-amplified metastatic colorectal cancer: a phase 2 trial.  
3 *Nature Medicine*. 2021/11/01 2021;27(11):1899-1903. doi:10.1038/s41591-021-01553-w
- 4 18. Goodall J, Mateo J, Yuan W, et al. Circulating Cell-Free DNA to Guide Prostate Cancer  
5 Treatment with PARP Inhibition. *Cancer Discov*. Sep 2017;7(9):1006-1017. doi:10.1158/2159-  
6 8290.Cd-17-0261
- 7 19. Kim ST, Banks KC, Lee S-H, et al. Prospective Feasibility Study for Using Cell-Free  
8 Circulating Tumor DNA–Guided Therapy in Refractory Metastatic Solid Cancers: An Interim  
9 Analysis. *JCO Precision Oncology*. 2017;(1):1-15. doi:10.1200/po.16.00059
- 10 20. Zill OA, Banks KC, Fairclough SR, et al. The landscape of actionable genomic  
11 alterations in cell-free circulating tumor DNA from 21,807 advanced cancer patients. *Clinical*  
12 *Cancer Research*. 2018;24(15):3528-3538.
- 13 21. Bettgowda C, Sausen M, Leary RJ, et al. Detection of Circulating Tumor DNA in Early-  
14 and Late-Stage Human Malignancies. *Science Translational Medicine*. 2014;6(224):224ra24-  
15 224ra24. doi:doi:10.1126/scitranslmed.3007094
- 16 22. McMahan JT, Studer M, Ulrich B, et al. Circulating Tumor DNA in Adults With Glioma: A  
17 Systematic Review and Meta-Analysis of Biomarker Performance. *Neurosurgery*. Aug 1  
18 2022;91(2):231-238. doi:10.1227/neu.0000000000001982
- 19 23. Drabovich AP, Saraon P, Jarvi K, Diamandis EP. Seminal plasma as a diagnostic fluid  
20 for male reproductive system disorders. *Nature Reviews Urology*. 2014/05/01 2014;11(5):278-  
21 288. doi:10.1038/nrrol.2014.74
- 22 24. Kim Y, Jeon J, Mejia S, et al. Targeted proteomics identifies liquid-biopsy signatures for  
23 extracapsular prostate cancer. *Nature communications*. 2016;7(1):11906.
- 24 25. Teng P-n, Bateman NW, Hood BL, Conrads TP. Advances in proximal fluid proteomics  
25 for disease biomarker discovery. *Journal of proteome research*. 2010;9(12):6091-6100.
- 26 26. Mair R, Mouliere F. Cell-free DNA technologies for the analysis of brain cancer. *British*  
27 *Journal of Cancer*. 2022/02/01 2022;126(3):371-378. doi:10.1038/s41416-021-01594-5
- 28 27. De Mattos-Arruda L, Mayor R, Ng CK, et al. Cerebrospinal fluid-derived circulating  
29 tumour DNA better represents the genomic alterations of brain tumours than plasma. *Nature*  
30 *communications*. 2015;6(1):8839.
- 31 28. Wang Y, Springer S, Zhang M, et al. Detection of tumor-derived DNA in cerebrospinal  
32 fluid of patients with primary tumors of the brain and spinal cord. *Proceedings of the National*  
33 *Academy of Sciences*. 2015;112(31):9704-9709. doi:doi:10.1073/pnas.1511694112
- 34 29. Pan W, Gu W, Nagpal S, Gephart MH, Quake SR. Brain tumor mutations detected in  
35 cerebral spinal fluid. *Clin Chem*. Mar 2015;61(3):514-22. doi:10.1373/clinchem.2014.235457
- 36 30. Pan C, Diplas BH, Chen X, et al. Molecular profiling of tumors of the brainstem by  
37 sequencing of CSF-derived circulating tumor DNA. *Acta neuropathologica*. 2019;137:297-306.
- 38 31. Martínez-Ricarte F, Mayor R, Martínez-Sáez E, et al. Molecular Diagnosis of Diffuse  
39 Gliomas through Sequencing of Cell-Free Circulating Tumor DNA from Cerebrospinal Fluid.  
40 *Clinical Cancer Research*. 2018;24(12):2812-2819. doi:10.1158/1078-0432.Ccr-17-3800
- 41 32. Mouliere F, Mair R, Chandrananda D, et al. Detection of cell-free DNA fragmentation  
42 and copy number alterations in cerebrospinal fluid from glioma patients. *EMBO Molecular*  
43 *Medicine*. 2018;10(12):e9323. doi:10.15252/emmm.201809323
- 44 33. Pagès M, Rotem D, Gydush G, et al. Liquid biopsy detection of genomic alterations in  
45 pediatric brain tumors from cell-free DNA in peripheral blood, CSF, and urine. *Neuro-Oncology*.  
46 2022;24(8):1352-1363. doi:10.1093/neuonc/noab299
- 47 34. Dong X, Zheng T, Zhang M, et al. Circulating Cell-Free DNA-Based Detection of Tumor  
48 Suppressor Gene Copy Number Loss and Its Clinical Implication in Metastatic Prostate Cancer.  
49 *Front Oncol*. 2021;11:720727. doi:10.3389/fonc.2021.720727

- 1 35. Huelster HL, Gould B, Schiffan EA, et al. Novel Use of Circulating Tumor DNA to Identify  
2 Muscle-invasive and Non-organ-confined Upper Tract Urothelial Carcinoma. *European Urology*.  
3 2023/10/04/ 2023;doi:10.1016/j.eururo.2023.09.017
- 4 36. Tam CS, Opat S, D'Sa S, et al. A randomized phase 3 trial of zanubrutinib vs ibrutinib in  
5 symptomatic Waldenström macroglobulinemia: the ASPEN study. *Blood*. 2020;136(18):2038-  
6 2050. doi:10.1182/blood.2020006844
- 7 37. Wang J, Liu Y, Liang Y, et al. Clinicopathologic features, genomic profiles and outcomes  
8 of younger vs. older Chinese hormone receptor-positive (HR+)/HER2-negative (HER2-)  
9 metastatic breast cancer patients. *Front Oncol*. 2023;13:1152575.  
10 doi:10.3389/fonc.2023.1152575
- 11 38. Nebot-Bral L, Brandao D, Verlingue L, et al. Hypermutated tumours in the era of  
12 immunotherapy: The paradigm of personalised medicine. *Eur J Cancer*. Oct 2017;84:290-303.  
13 doi:10.1016/j.ejca.2017.07.026
- 14 39. Han S, Liu Y, Cai SJ, et al. IDH mutation in glioma: molecular mechanisms and potential  
15 therapeutic targets. *British Journal of Cancer*. 2020/05/01 2020;122(11):1580-1589.  
16 doi:10.1038/s41416-020-0814-x
- 17 40. Henriksen TV, Reinert T, Christensen E, et al. The effect of surgical trauma on  
18 circulating free DNA levels in cancer patients-implications for studies of circulating tumor DNA.  
19 *Mol Oncol*. Aug 2020;14(8):1670-1679. doi:10.1002/1878-0261.12729
- 20 41. Rosen AW, Gögenur M, Paulsen IW, et al. Perioperative changes in cell-free DNA for  
21 patients undergoing surgery for colon cancer. *BMC Gastroenterology*. 2022/04/06  
22 2022;22(1):168. doi:10.1186/s12876-022-02217-w
- 23 42. Konishi S, Narita T, Hatakeyama S, et al. Utility of total cell-free DNA levels for surgical  
24 damage evaluation in patients with urological surgeries. *Scientific Reports*. 2021/11/11  
25 2021;11(1):22103. doi:10.1038/s41598-021-01430-z
- 26 43. Fernandez-Garcia D, Hills A, Page K, et al. Plasma cell-free DNA (cfDNA) as a  
27 predictive and prognostic marker in patients with metastatic breast cancer. *Breast Cancer Res*.  
28 Dec 19 2019;21(1):149. doi:10.1186/s13058-019-1235-8
- 29 44. Koukourakis MI, Xanthopoulou E, Koukourakis IM, et al. Circulating Plasma Cell-free  
30 DNA (cfDNA) as a Predictive Biomarker for Radiotherapy: Results from a Prospective Trial in  
31 Head and Neck Cancer. *Cancer Diagn Progn*. Sep-Oct 2023;3(5):551-557.  
32 doi:10.21873/cdp.10254
- 33 45. Razavi P, Li BT, Brown DN, et al. High-intensity sequencing reveals the sources of  
34 plasma circulating cell-free DNA variants. *Nature Medicine*. 2019/12/01 2019;25(12):1928-1937.  
35 doi:10.1038/s41591-019-0652-7
- 36 46. Miller AM, Shah RH, Pentsova EI, et al. Tracking tumour evolution in glioma through  
37 liquid biopsies of cerebrospinal fluid. *Nature*. 2019/01/01 2019;565(7741):654-658.  
38 doi:10.1038/s41586-019-0882-3
- 39 47. Gaspar LE, Fisher BJ, Macdonald DR, et al. Supratentorial malignant glioma: patterns of  
40 recurrence and implications for external beam local treatment. *Int J Radiat Oncol Biol Phys*.  
41 1992;24(1):55-7. doi:10.1016/0360-3016(92)91021-e
- 42 48. Brandes AA, Tosoni A, Franceschi E, et al. Recurrence pattern after temozolomide  
43 concomitant with and adjuvant to radiotherapy in newly diagnosed patients with glioblastoma:  
44 correlation with MGMT promoter methylation status. *J Clin Oncol*. 2009;27(8):1275-1279.
- 45 49. Chen X, Chang C-W, Spoerke JM, et al. Low-pass Whole-genome Sequencing of  
46 Circulating Cell-free DNA Demonstrates Dynamic Changes in Genomic Copy Number in a  
47 Squamous Lung Cancer Clinical Cohort. *Clinical Cancer Research*. 2019;25(7):2254-2263.  
48 doi:10.1158/1078-0432.Ccr-18-1593
- 49 50. Huffman BM, Aushev VN, Budde GL, et al. Analysis of Circulating Tumor DNA to Predict  
50 Risk of Recurrence in Patients With Esophageal and Gastric Cancers. *JCO Precision Oncology*.  
51 2022;(6):e2200420. doi:10.1200/po.22.00420



- 1 51. Tie J, Cohen JD, Wang Y, et al. Circulating Tumor DNA Analyses as Markers of  
2 Recurrence Risk and Benefit of Adjuvant Therapy for Stage III Colon Cancer. *JAMA Oncol.* Dec  
3 1 2019;5(12):1710-1717. doi:10.1001/jamaoncol.2019.3616
- 4 52. Liu APY, Smith KS, Kumar R, et al. Serial assessment of measurable residual disease in  
5 medulloblastoma liquid biopsies. *Cancer Cell.* Nov 8 2021;39(11):1519-1530.e4.  
6 doi:10.1016/j.ccell.2021.09.012  
7

# Patient 24 – Recurrent GBM

**A**

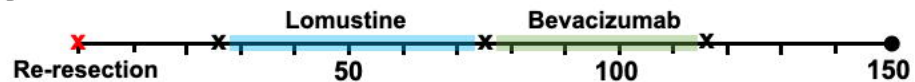

**B**

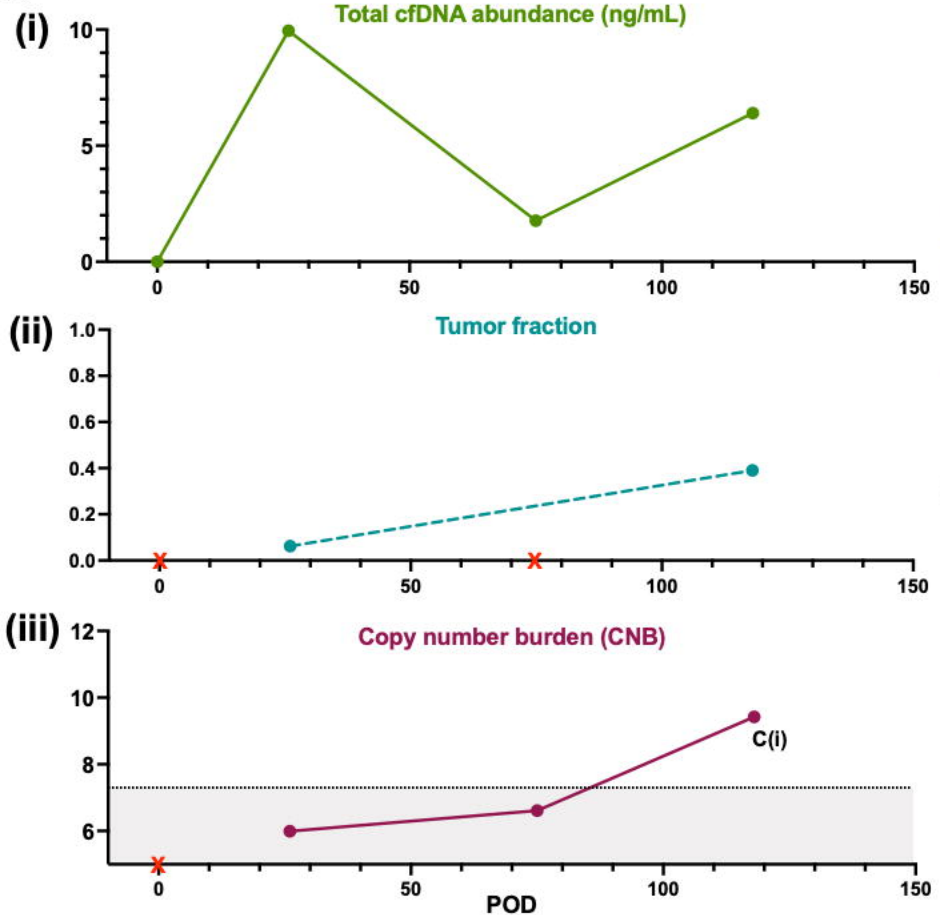

POD 0

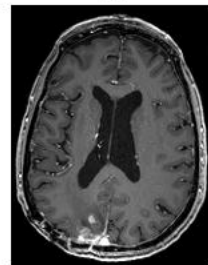

26

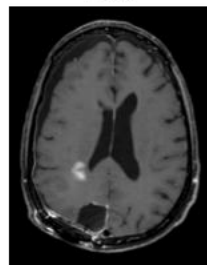

75

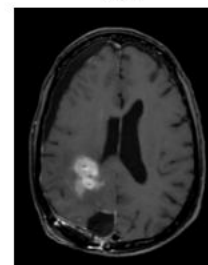

118

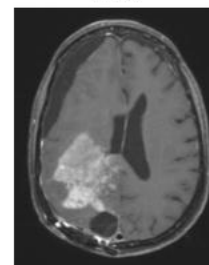

**C(i) POD118**

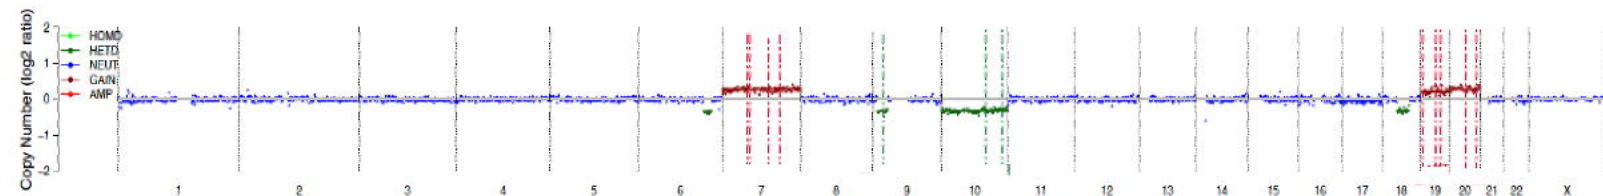

**C(ii) POD26    POD118**

|      |       |                  |
|------|-------|------------------|
| 3.21 | 44.84 | EGFR:p.Arg108Lys |
|      | 10.66 |                  |
|      | 0.54  | TP53:c.96+1G>A   |

\*POD75 – insufficient amount of cfDNA for NGS

**D**

**Observations: Patient 24  
Recurrent GBM**

- 1) Tumor fraction may increase with progression (B.ii).
- 2) CNB may increase above the limit of quantification with progression (B.iii).
- 3) If NGS is possible, tumor-associated VAFs may increase with progression (C.ii).

**Question:**

Could alkylating chemotherapy decrease CSF cfDNA regardless of its efficacy?

# Patient 78 – GBM

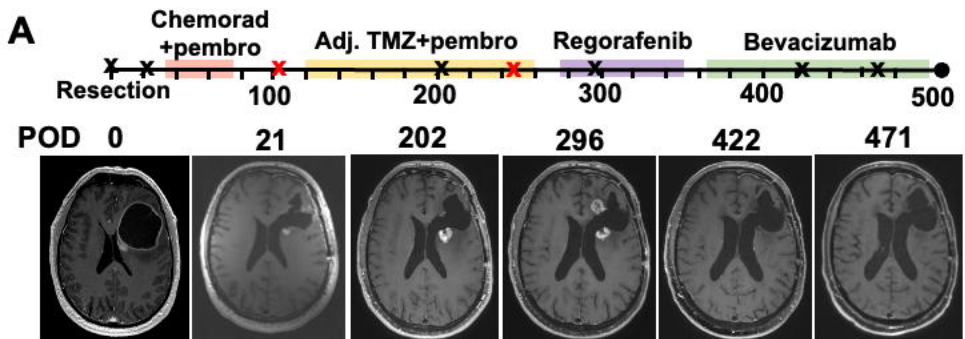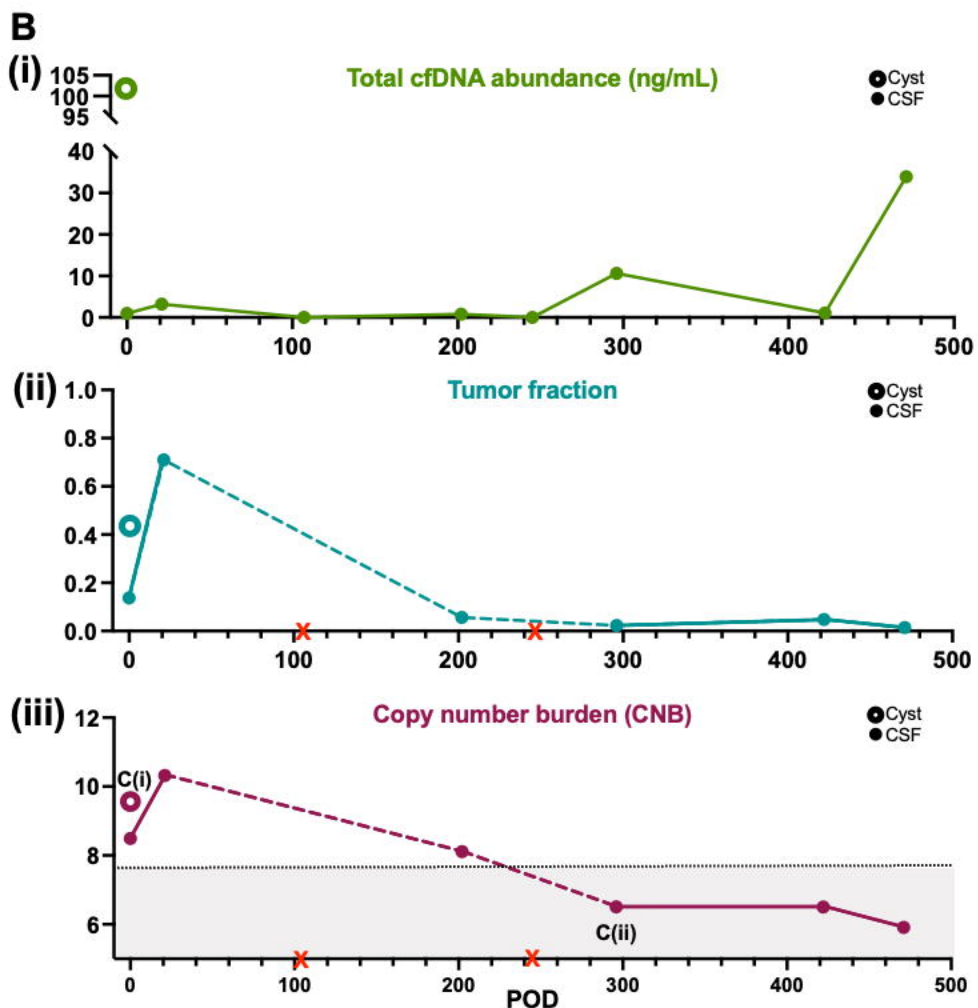

## C(i) POD0 - Cyst

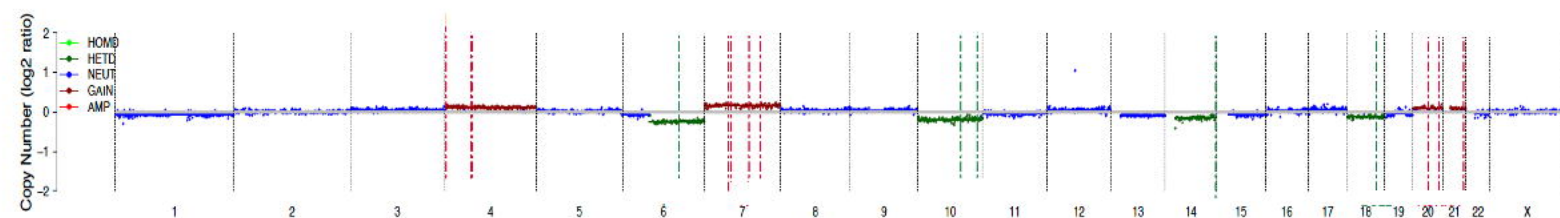

## C(ii) POD296

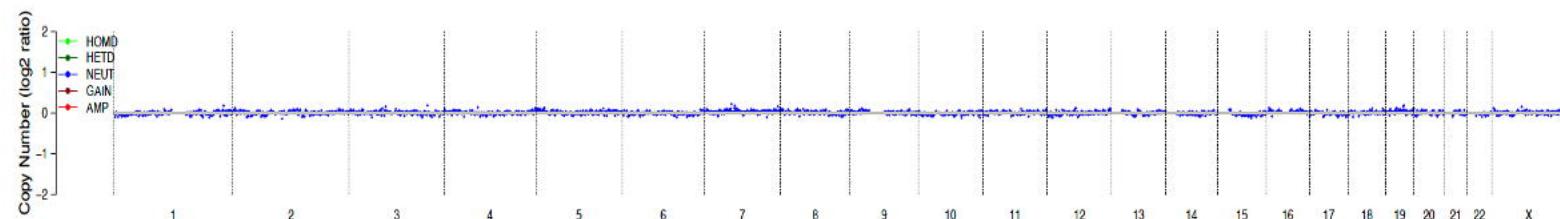

## C(iii)

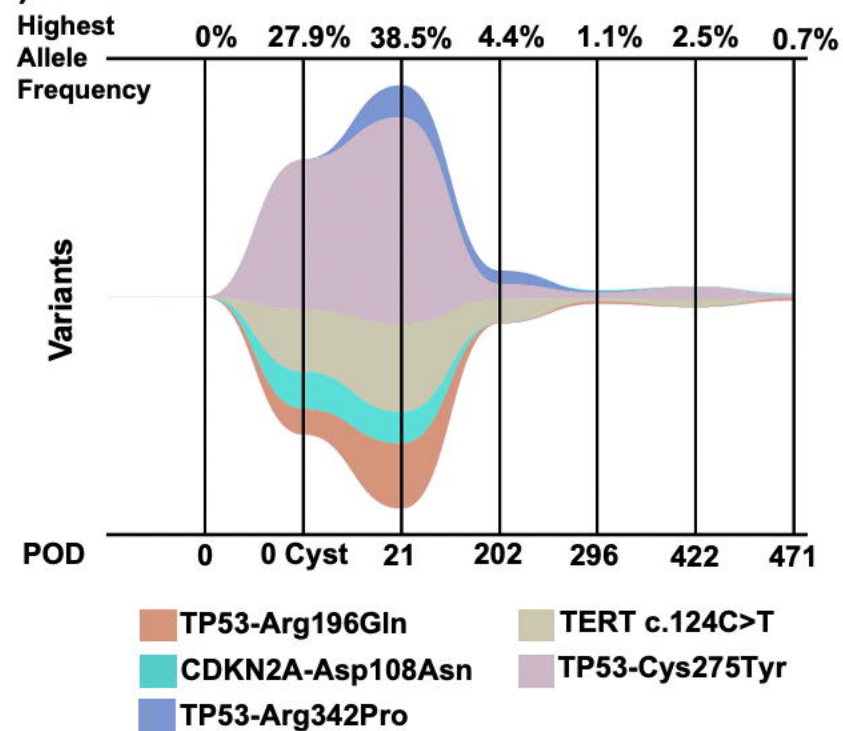

## D Observations: Patient 78 GBM

- 1) Resection may not decrease CSF cfDNA if there is greater CSF contact with residual tumor after resection (B.i).
- 2) CNB may decrease below the limit of quantification during chemoradiation (B.iii).
- 2) Tumor-associated VAFs may decrease during chemoradiation (C.iii).

### Question:

Could pseudoprogression increase total CSF cfDNA?

# Patient 79 – GBM, mismatch repair deficient

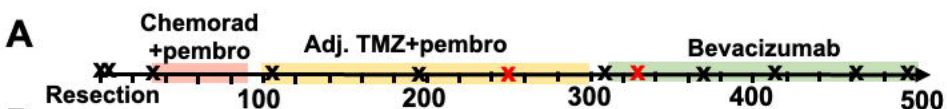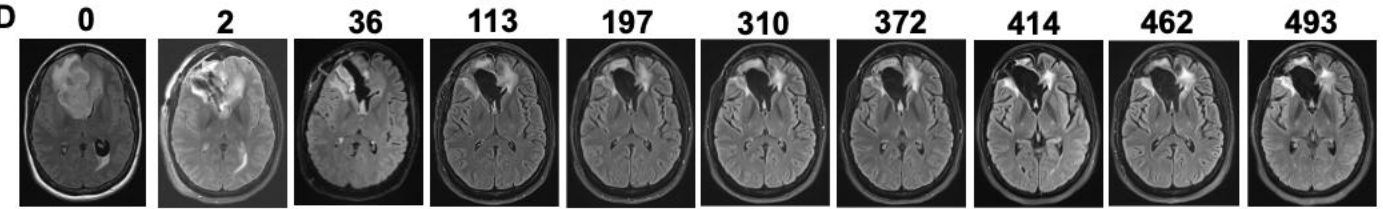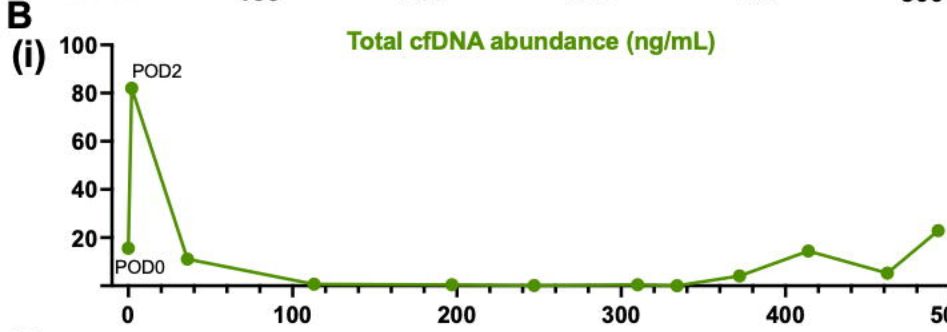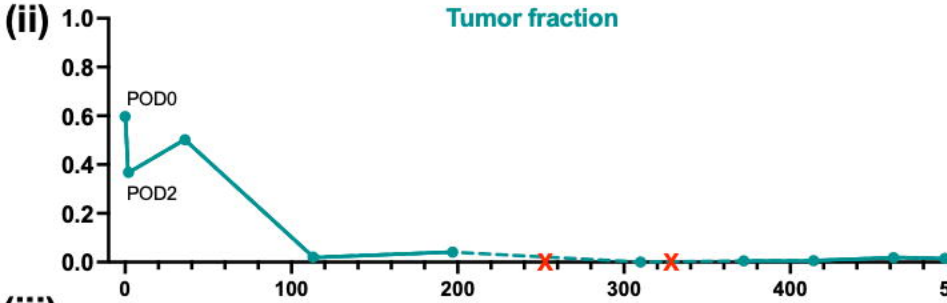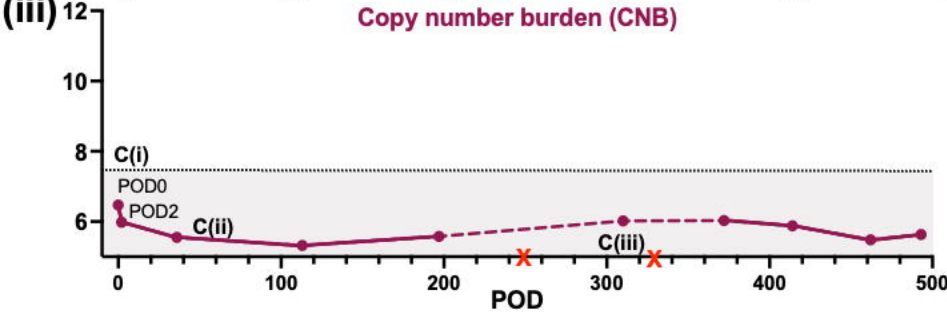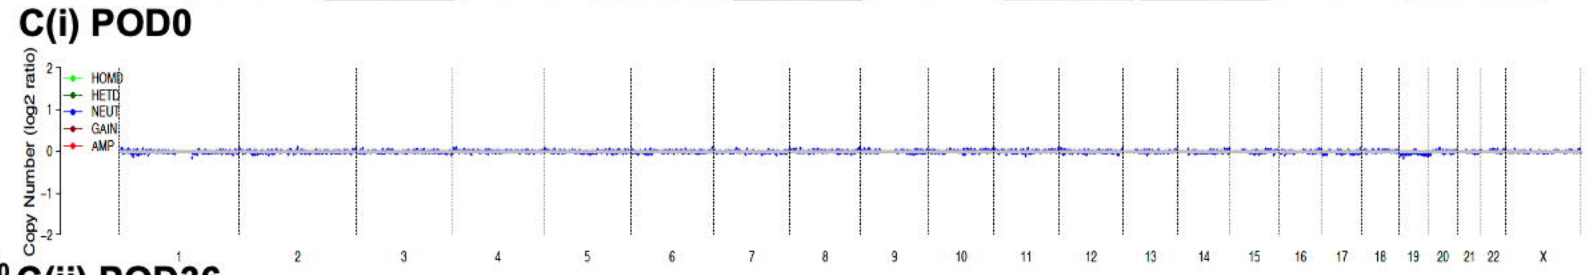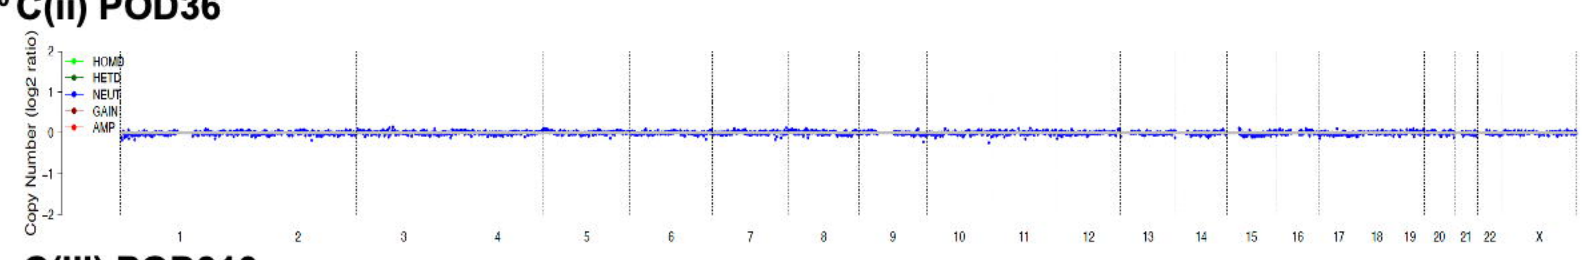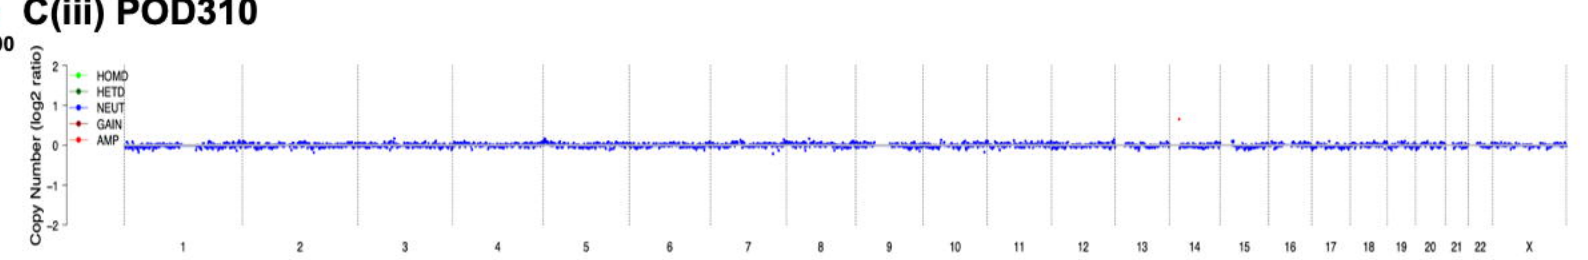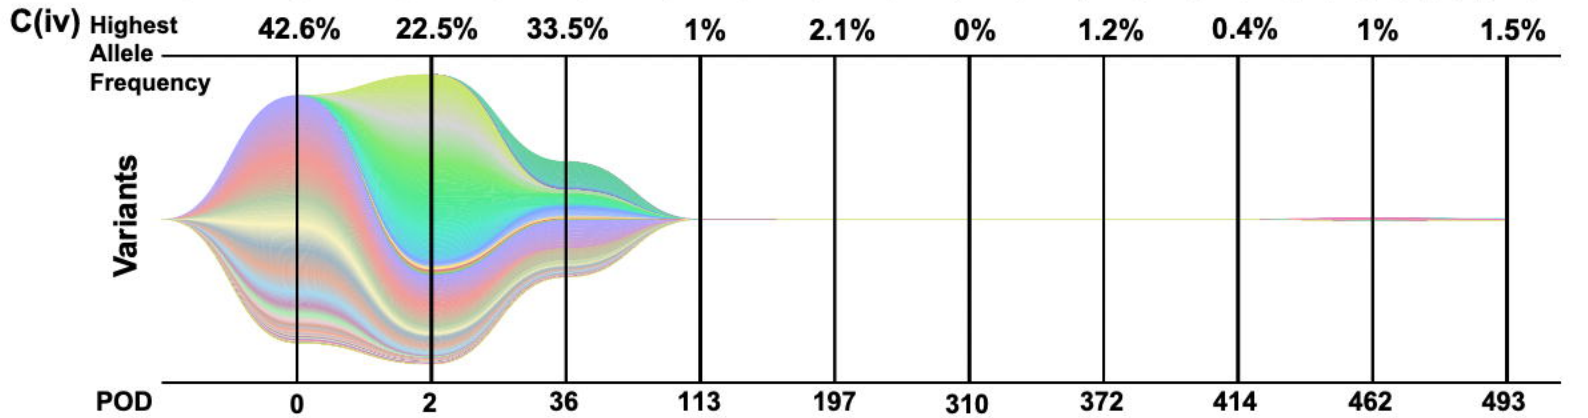

**D**

Observations: Patient 79  
GBM

- 1) Early post-operative CSF samples may have transiently increased cfDNA (B.i).
- 2) CNB likely not useful for monitoring if minimal chromosomal complexity (B.iii).
- 3) Resection exposes more variants in hypermutated GBM that evolve over time (C.iv).

**Question:**  
Can a post-operative CSF sample better capture tumor heterogeneity?

# Patient 98 – Astrocytoma, IDH mutant (Grade 4)

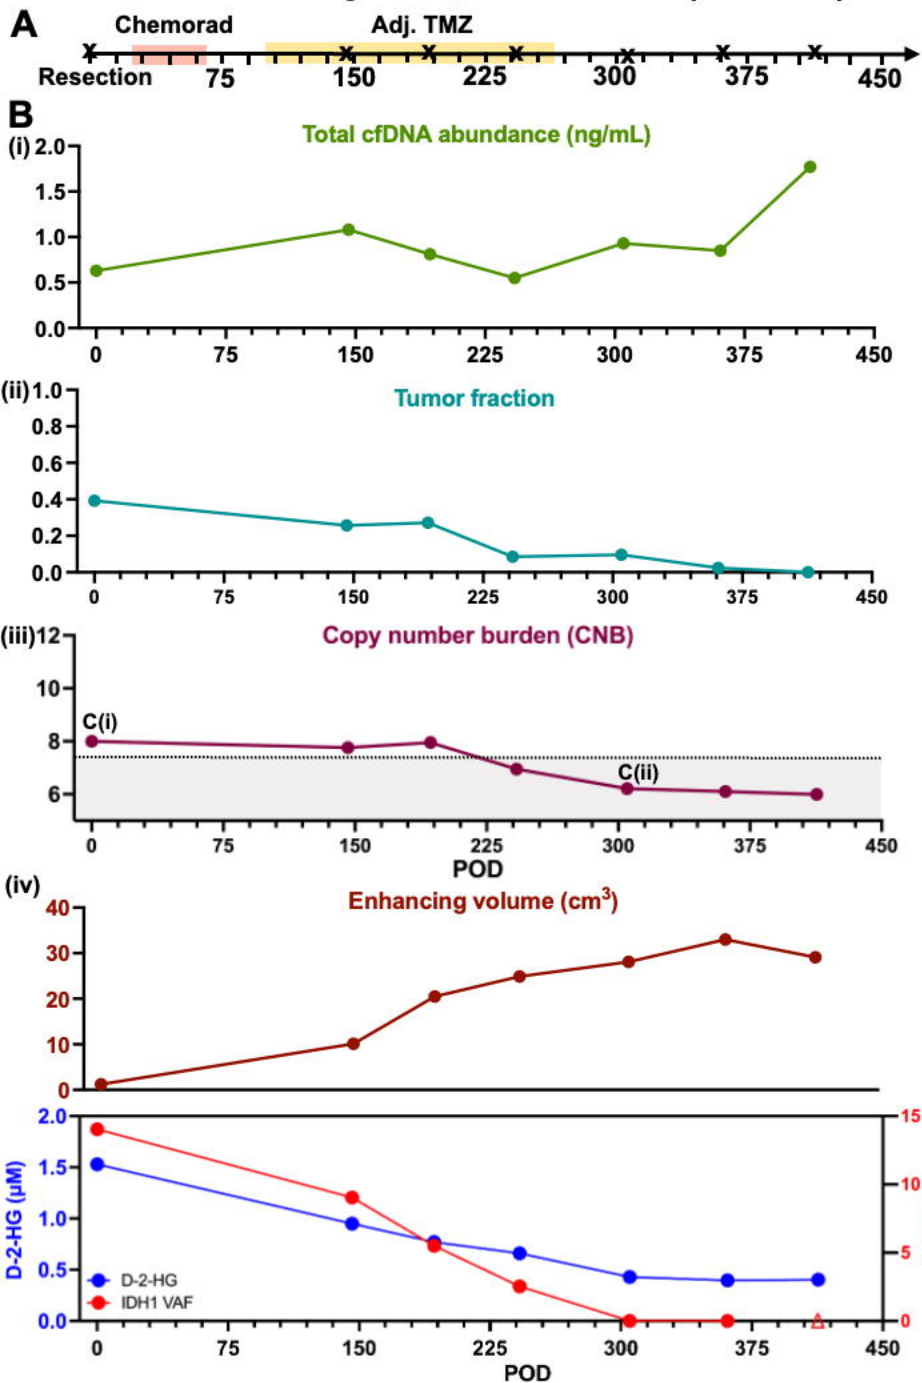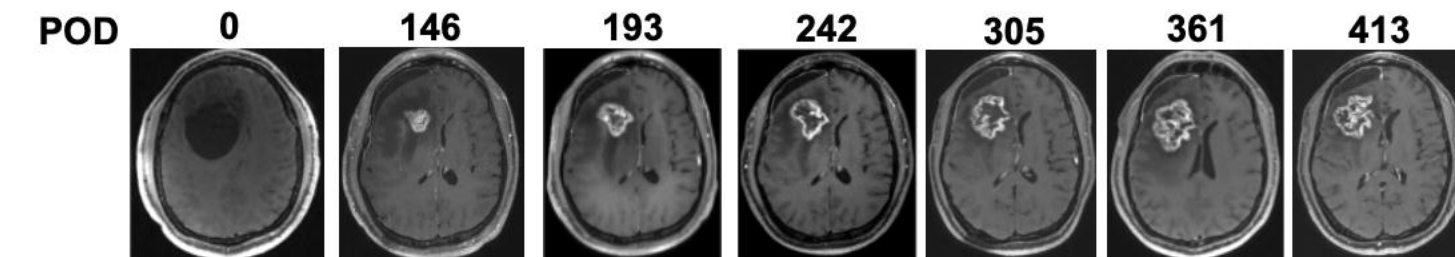

## C(i) POD0

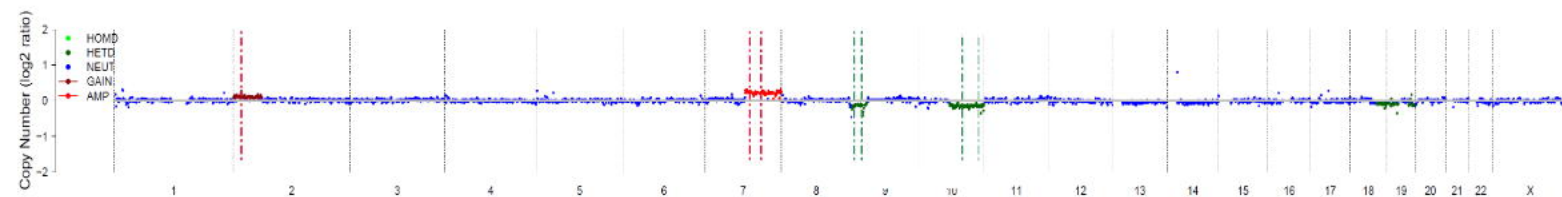

## C(ii) POD305

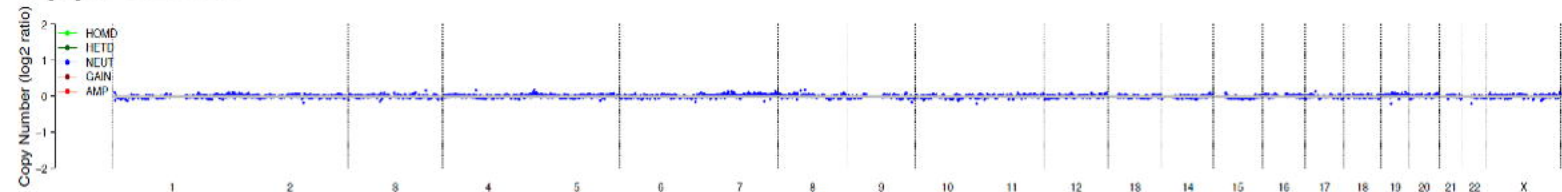

## C(iii) Highest Allele Frequency

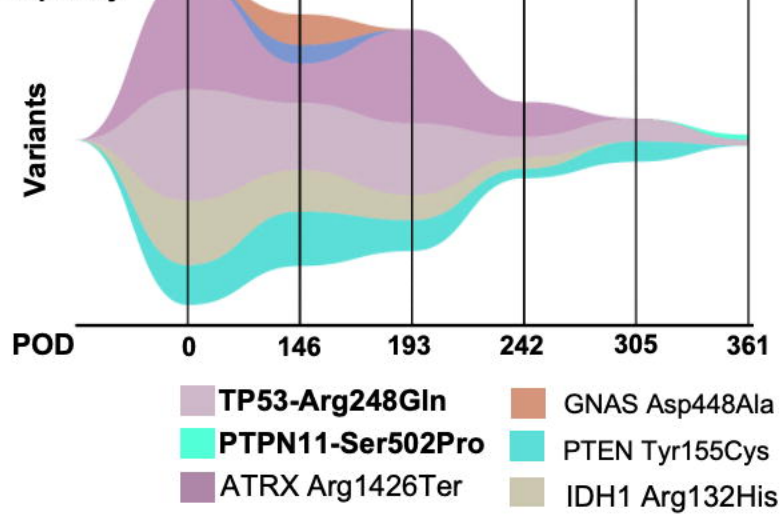

## D

### Observations: Patient 98 Astrocytoma, IDH mutant (CNS WHO grade 4)

1) CNB decreases below the limit of quantification during treatment (B.iii).

2) IDH1 VAF correlate with changes in D-2-HG in CSF (B.iv).

### Questions:

1. Could pseudoprogression increase CSF cfDNA yield?
2. Is CSF cfDNA superior to MRI for treatment response monitoring?

# Patient 138 – Astrocytoma, IDH mutant (Grade 4)

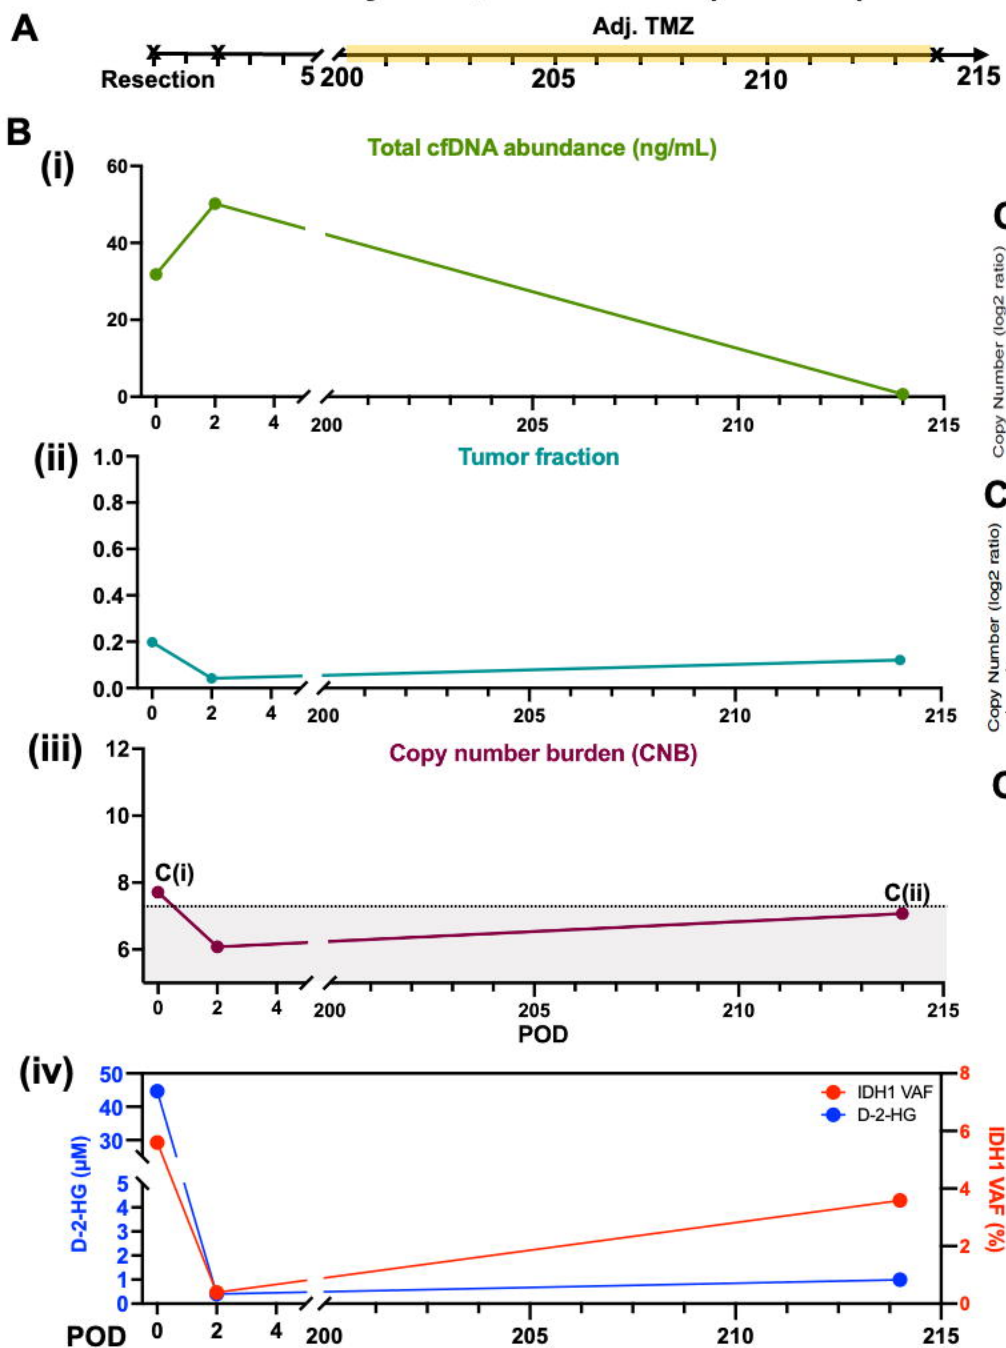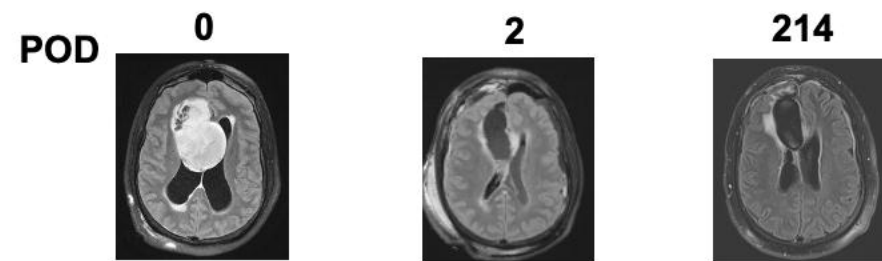

**C(i) POD0**

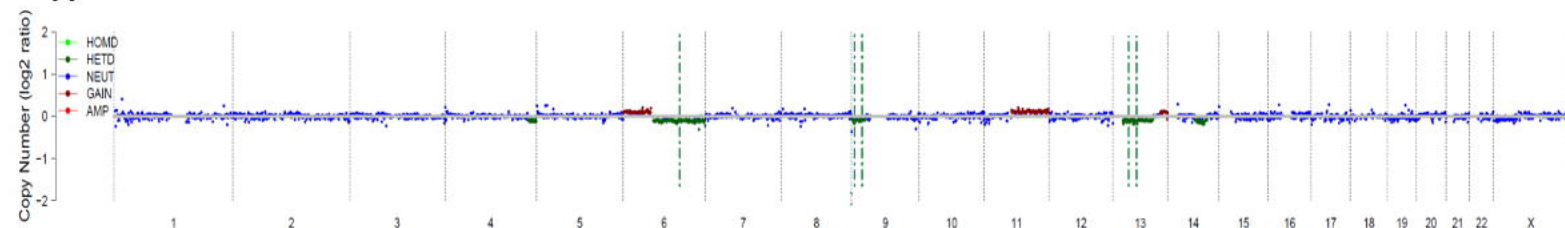

**C(ii) POD214**

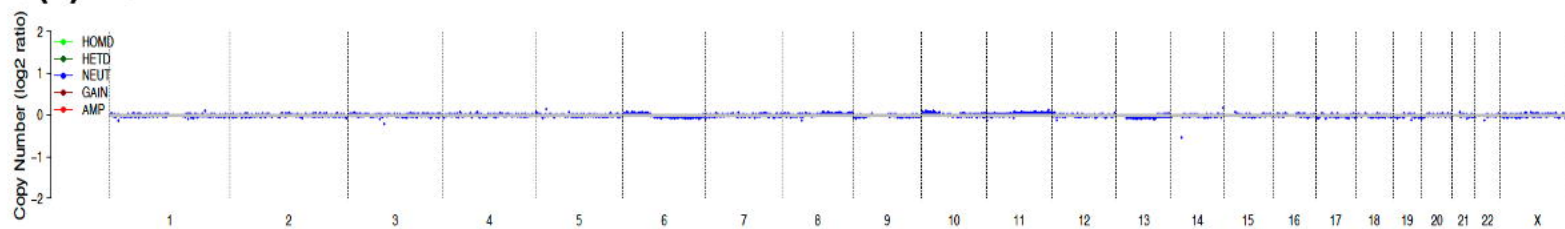

**C(iii) Highest Allele Frequency**

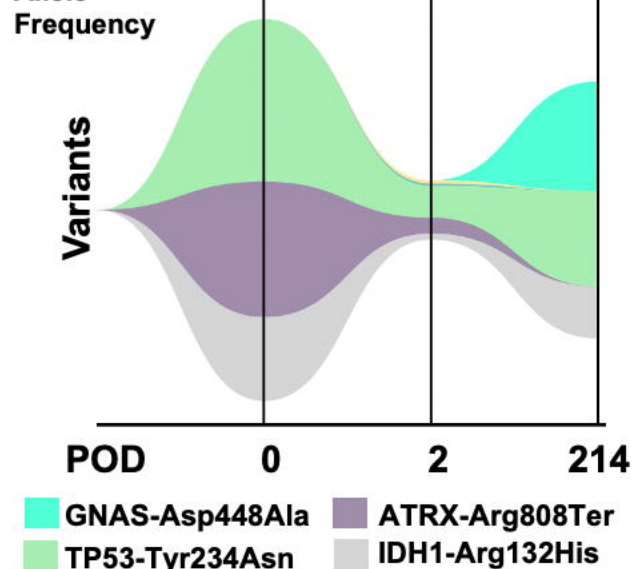

**D**

## Observations: Patient 138 Astrocytoma, IDH mutant (CNS WHO grade 4)

1) Tumor fraction may increase with suspected disease progression (B.ii).

2) IDH VAF correlate with changes in D-2-HG in CSF (C.iii).

1) Resection increases cfDNA yield, but may decrease tumor-derived VAFs (C.iii).

### Question:

What is the threshold of change to call disease progression?
